# **Application of diagnostic network optimization in Kenya and Nepal to design integrated, sustainable and efficient bacteriology and antimicrobial resistance surveillance networks**

**Marie Brunetti<sup>1</sup>, Amit Singh<sup>2</sup>, Sheilla Chebore<sup>3</sup>, Deepak Gyenwali<sup>4</sup>, Nada Malou<sup>1</sup>, Cecilia Ferreyra<sup>1</sup>, Tulsi Ram Gombo<sup>5</sup>, Jyoti Acharya<sup>6</sup>, Nisha Rijal<sup>6</sup>, Susan Githii<sup>7</sup>, Evelyn Wesangula<sup>7</sup>, Heidi Albert<sup>8</sup>**

<sup>1</sup> FIND, Geneva, Switzerland

<sup>2</sup> FIND, Bangalore, India

<sup>3</sup> FIND, Nairobi, Kenya

<sup>4</sup> FIND, Kathmandu, Nepal

<sup>5</sup> Central Veterinary Laboratory, Kathmandu, Nepal

<sup>6</sup> National Public Health Laboratory, Kathmandu, Nepal

<sup>7</sup> National Antimicrobial Stewardship Interagency Committee, Nairobi, Kenya

<sup>8</sup> FIND, Cape Town, South Africa

**The authors have withdrawn this manuscript as it contains data that did not have the proper permissions to be publicly distributed. Therefore, the authors do not wish this work to be cited as a reference for the project. Please refer to the published version under DOI: 10.1371/journal.pgph.0002247. If you have any questions, please contact the corresponding author.**
